# Supplementary material
Source: PubMed Central journal article supplement (PMC1693937)
Supplement: plntcell_tpc.106.043299_1.pdf [file plntcell_tpc.106.043299_1.pdf]

# Supplemental material

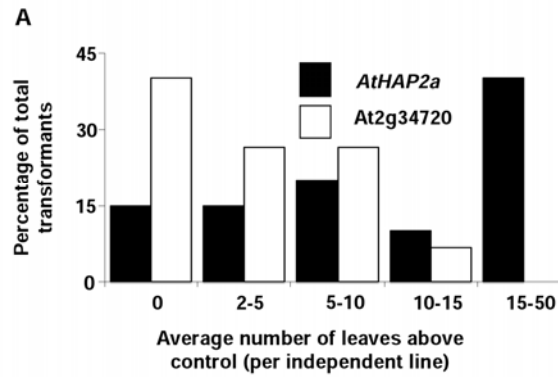

S1. Comparison of the late flowering phenotypes of *SUC2::At3g34720* and *SUC2::AtHAP2a* transgenic plants compared to wildtype grown under LDs.
